# Supplementary material
Source: publisher site journal article supplement (https://www.dovepress.com/get_supplementary_file.php?f=404848.docx)
Supplement: Supplementary file 1 [file get_supplementary_file.php]

**Supplementary Materials**

**Disulfide bond-based SN38 prodrug nanoassemblies with high drug loading and reduction-triggered drug release for pancreatic cancer therapy**

Zhi-Xin Zhong1,*, Xu-Zhao Li1,*, Jin-Tao Liu1, Nan Qin1, Hong-Quan Duan1,2,3,#, Xiao-Chuan Duan1,4,#

1 School of Pharmacy, Tianjin Medical University, Tianjin 300070 (P.R. China)

2 Research Center of Basic Medical Sciences, Tianjin Medical University, Tianjin 300070 (P.R. China)

3 Key Laboratory of Immune Microenvironment and Disease (Ministry of Education), Tianjin Medical University, Tianjin 300070 (P.R. China)

4 School of Biomedical Engineering and Technology, Tianjin Medical University, Tianjin 300070 (P.R. China)

* These authors contributed equally to this work.

# Corresponding author.

Tel: +86-22-83336680

Fax: +86-22-83336560

Email address: [duanhq@tmu.edu.cn](mailto:duanhq@tmu.edu.cn), [duanxc@tmu.edu.cn](mailto:duanxc@tmu.edu.cn)

1. **Chemistry**

**1.1 General instrumentation**

All reagents and solvents were obtained from commercial sources and used without purification unless mentioned. Reactions were monitored by thin-layer chromatography (TLC) using precoated silica gel glass plates containing a fluorescence indicator. The column chromatography was carried out on silica gel (300-400 mesh) (Qingdao Haiyang Chemical Co. Ltd., Qingdao, Shandong province, China). 1H and 13C NMR spectra were taken using a Bruker AVANCE III 400 instrument (Bruker Biospin AG, Fallanden, Switzerland). The high-resolution mass spectra were recorded on an Agilent 1200 LC-MS in ESI mode (Agilent, Palo Alto, CA, USA).

**1.2 Comnpoud 1**

Yield: 40.5%. 1H NMR, (400 MHz, CDCl3) δ: 0.95 (3H, t, *J* = 7.2 Hz, H-a) , 1.43 (2H, m, H-b), 1.67 (2H, m, H-c), 2.72 (2H, t, *J* = 7.2 Hz,H-d), 2.85 (2H, t, *J* = 6.0 Hz, H-e), 3.90 (2H, t, *J* = 5.6 Hz, H-f)。

**1.3 Compound 2**

Yield: 84.8%. 1H NMR, (400 MHz, CDCl3) δ: 0.86 (3H, t, *J* = 7.3 Hz), 0.94 (3H, t, *J* = 7.3 Hz), 1.01 (3H, t, *J* = 7.3 Hz), 1.39 (7H, m), 1.58 (2H, m), 1.70 (2H, m), 2.23 (2H, m), 2.65 (2H, t, *J* = 7.3 Hz), 2.76 (2H, t, *J* = 7.3 Hz), 2.90 (2H, t, *J* = 6.9 Hz), 3.05 (2H, t, *J* = 6.6 Hz), 3.16 (2H, q, *J* = 7.3 Hz), 4.36 (2H, m), 4.59 (2H, t, *J* = 6.6 Hz), 5.25 (2H, s), δ 5.40 (1H, d, *J* = 17.2 Hz), 5.71 (1H, d, *J* = 17.2 Hz, 1H), 7.32 (1H, s), 7.68, 8.26 (each 1H, d, *J* = 9.2 Hz), 7.94 (1H, s). 13C NMR (100 MHz, CDCl3) δ: 167.3, 157.3, 153.4, 153.2, 151.9, 149.9, 147.3, 146.8, 145.7, 145.6, 132.1, 127.4, 127.3, 124.8, 120.3, 114.2, 78.0, 77.4, 67.9, 66.9, 66.8, 49.3, 38.9, 36.7, 36.3, 31.9, 31.2, 31.1, 23.2, 21.6, 21.5, 14.0, 13.7, 13.6, 7.6. HR-ESIMS: *m/z* 775.1946 [M-H]-, C36H44N2O9S4, calcd. 776.1930.

**2. Purity analysis of SN38-diSS**

The purity of SN38-diSS (93.93%) was analyzed using Agilent Technologies 1200 series (Agilent, Palo Alto, CA, USA) and calculated according to the peak area normalization method (subtracted the solvent peak of methanol).


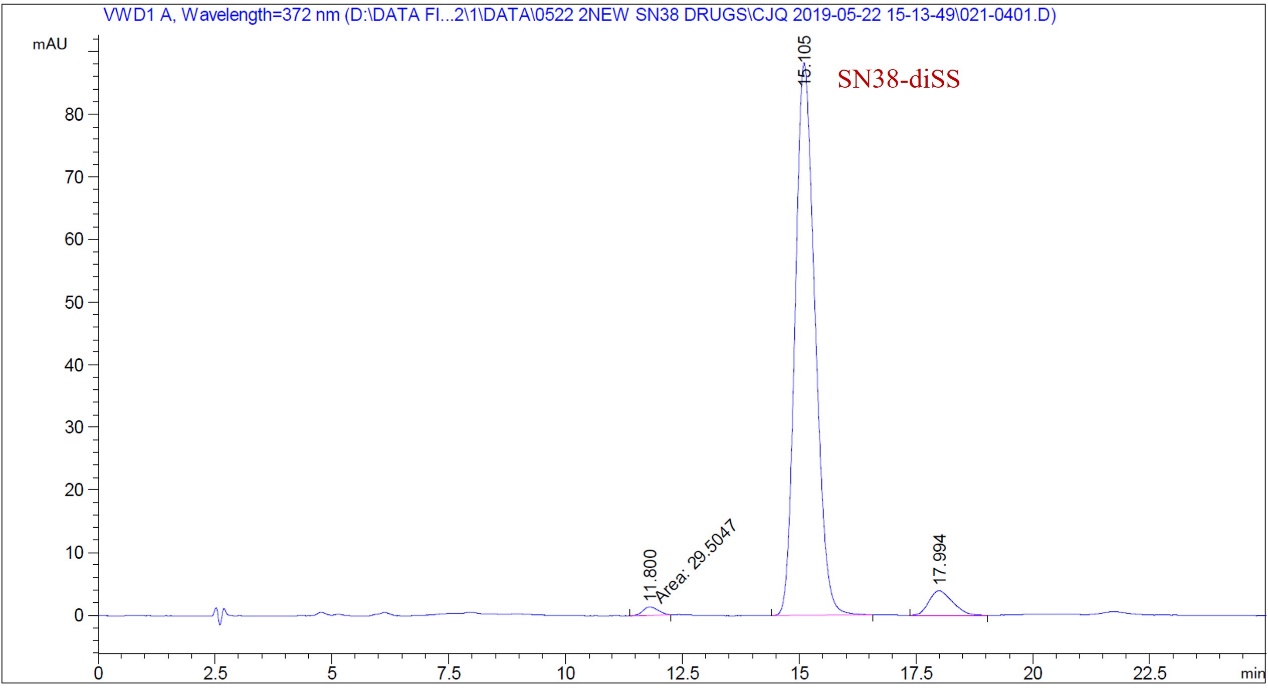


**Figure S1.** HPLC spectrum of compound SN38-diSS**.**

**Table S1.** Calculating of Hansen solubility parameter of SN38 according to the group contribution method (GCM).

| **Structural group** | **Number** | **∑Fd** | **∑Fp** | **∑F2p** | **∑Eh** | **∑V** |
| --- | --- | --- | --- | --- | --- | --- |
| **of groups** | **J1/2 cm3/2 mol-1** | **J1/2 cm3/2 mol-1** |  | **J/mol** |  |
| **-CH3** | 2 | 838 | 0 | 0 | 0 | 63.4 |
| **-CH2-** | 4 | 1080 | 0 | 0 | 0 | 66.4 |
| **>C<** | 1 | -70 | 0 | 0 | 0 | -19.2 |
| **=CH-** | 1 | 223 | 70 | 4900 | 143 | 12.4 |
| **=C<** | 6 | 270 | 420 | 29400 | 858 | -34.2 |
| **5 or 6 member ring** | 4 | 760 | 0 | 0 | 0 | 54 |
| **-N=** | 1 | 164 | 1323 | 1750329 | 1759 | 4 |
| **-CON<** | 1 | 301 | 1229 | 1510441 | 4772 | 13.2 |
| **-OH** | 2 | 422 | 998 | 498002 | 19546 | 20.94 |
| **-COO-ester** | 1 | 667 | 511 | 261121 | 2557 | 8.2 |
| **Phenyl<** | 1 | 1319 | 133 | 17689 | 205 | 60.4 |
| **SUM** |  | 5974 |  | 4071882 | 29840 | 249.54 |

**Table S2.** Calculating of Hansen solubility parameter of SN38-diSS according to the group contribution method (GCM).

| **Structural group** | **Number** | **∑Fd** | **∑Fp** | **∑F2p** | **∑Eh** | **∑V** |
| --- | --- | --- | --- | --- | --- | --- |
| of groups | **J1/2 cm3/2 mol-1** | **J1/2 cm3/2 mol-1** |  | **J/mol** |  |
| **-CH3** | 4 | 1676 | 0 | 0 | 0 | 126.8 |
| **-CH2-** | 14 | 3780 | 0 | 0 | 0 | 232.4 |
| **>C<** | 1 | -70 | 0 | 0 | 0 | -19.2 |
| **=CH-** | 1 | 223 | 70 | 4900 | 143 | 12.4 |
| **=C<** | 6 | 270 | 420 | 29400 | 858 | -34.2 |
| **5 or 6 member ring** | 4 | 760 | 0 | 0 | 0 | 54 |
| **-N=** | 1 | 164 | 1323 | 1750329 | 1759 | 4 |
| **-CON<** | 1 | 301 | 1229 | 1510441 | 4772 | 13.2 |
| **-COO-ester** | 3 | 2001 | 1533 | 783363 | 7671 | 24.6 |
| **-O-** | 1 | 235 | 409 | 167281 | 2352 | 3.6 |
| **-O- aromatic** | 1 | 100 | 401 | 160801 | 1467 | 3.8 |
| **-S-** | 4 | 1816 | 1448 | 524176 | 884 | 32 |
| **Phenyl<** | 1 | 1319 | 133 | 17689 | 205 | 60.4 |
| **SUM** |  | 12575 |  | 4948380 | 20111 | 513.8 |

**Table S3.** Types and concentrations of inhibitors used in the research

| Inhibitors | Function | Concentration (μM) |
| --- | --- | --- |
| EIPA | Inhibitor of macropinocytosis | 20 μM |
| CPZ | Inhibitor of clathrin | 30 μM |
| Hypertonic sucrose | Inhibitor of clathrin | 0.4 M |
| Filipin | Inhibitor of lipid raft | 0.5 μg ml-1 |

**Table S4.** Size and polydispersity index (PDI) of SNSS NAs with different amount of DSPE-PEG2k.

| DSPE-PEG2k  (wt %) | 0 | 5 | 10 | 20 | 30 | 40 | 50 |
| --- | --- | --- | --- | --- | --- | --- | --- |
| Size (nm) | 81.7  ±5.11 | 84.5  ±3.02 | 85.9  ±2.18 | 89.1  ±1.99 | 91.7  ±5.00 | 95.7  ±2.89 | 103.2  ±7.35 |
| PDI | 0.088  ±0.004 | 0.097  ±0.020 | 0.136  ±0.020 | 0.161  ±0.017 | 0.155  ±0.041 | 0.170  ±0.039 | 0.186  ±0.074 |
